# Supplementary material for: Avifaunal Community Assemblages in Transforming Non-Protected Ecosystems: Evidence from Citizen Science Data in Southern West Bengal
Source: Research Square preprint supplement (doi:10.21203/rs.3.rs-8767239/v1), 2026-02-20
Supplement: Supplementary file 1 [file 7c1f67133326976ce55fd187.docx]

**Supplimentary Information:**

Annexure 1. LULC transitions from 2017 to 2023 in the study area.

| Sr. no | From_2017 | To_2023 | Area_sq_km | Sr. no | From_2017 | To_2023 | Area_sq_km |
| --- | --- | --- | --- | --- | --- | --- | --- |
| 1 | Bare Ground | Water | 13.46 | 26 | Flooded Vegetation | Built area | 0.52 |
| 2 | Bare Ground | Trees | 0.95 | 27 | Flooded Vegetation | Bare Ground | 0 |
| 3 | Bare Ground | Flooded Vegetation | 0.02 | 28 | Flooded Vegetation | Rangeland | 0.07 |
| 4 | Bare Ground | Crops | 1.7 | 29 | Rangeland | Water | 3.73 |
| 5 | Bare Ground | Built area | 2.86 | 30 | Rangeland | Trees | 114.75 |
| 6 | Bare Ground | Bare Ground | 37.25 | 31 | Rangeland | Flooded Vegetation | 0.23 |
| 7 | Bare Ground | Rangeland | 16.35 | 32 | Rangeland | Crops | 69.17 |
| 8 | Built area | Water | 1.45 | 33 | Rangeland | Built area | 23.92 |
| 9 | Built area | Trees | 29.85 | 34 | Rangeland | Bare Ground | 0.54 |
| 10 | Built area | Flooded Vegetation | 0.02 | 35 | Rangeland | Rangeland | 332.49 |
| 11 | Built area | Crops | 22.74 | 36 | Trees | Water | 3.28 |
| 12 | Built area | Built area | 553.22 | 37 | Trees | Trees | 1426.37 |
| 13 | Built area | Bare Ground | 0.1 | 38 | Trees | Flooded Vegetation | 0.06 |
| 14 | Built area | Rangeland | 13.29 | 39 | Trees | Crops | 77.7 |
| 15 | Crops | Water | 49.08 | 40 | Trees | Built area | 226.62 |
| 16 | Crops | Trees | 258.56 | 41 | Trees | Bare Ground | 0.14 |
| 17 | Crops | Flooded Vegetation | 0.2 | 42 | Trees | Rangeland | 107.32 |
| 18 | Crops | Crops | 5058.36 | 43 | Water | Water | 53.19 |
| 19 | Crops | Built area | 215.55 | 44 | Water | Trees | 3.43 |
| 20 | Crops | Bare Ground | 0.2 | 45 | Water | Flooded Vegetation | 0.39 |
| 21 | Crops | Rangeland | 266.13 | 46 | Water | Crops | 12.2 |
| 22 | Flooded Vegetation | Water | 0.67 | 47 | Water | Built area | 4.61 |
| 23 | Flooded Vegetation | Trees | 0.1 | 48 | Water | Bare Ground | 10.47 |
| 24 | Flooded Vegetation | Flooded Vegetation | 0.03 | 49 | Water | Rangeland | 5.46 |
| 25 | Flooded Vegetation | Crops | 0.59 |  |  |  |  |

Annexure 2. Species checklist along with ecological traits.

| **SR. NO** | **COMMON_NAME** | **SCIENTIFIC** | **Diet Guild** | **Habitat Specialization** | **Endemicity** | **Migratory Status within India** |
| --- | --- | --- | --- | --- | --- | --- |
| 1 | Barn Owl | Tyto alba | Vertebrate & Carrion | Non-specialized | Non-endemic | Resident |
| 2 | Common Myna | Acridotheres tristis | Omnivore | Non-specialized | Non-endemic | Resident |
| 3 | Spotted Dove | Spilopelia chinensis | Plant & Seed | Non-specialized | Non-endemic | Resident |
| 4 | Asian Green Bee-eater | Merops orientalis | Invertebrate | Non-specialized | Non-endemic | Resident |
| 5 | Gray-breasted Prinia | Prinia hodgsonii | Invertebrate | Non-specialized | Non-endemic | Resident |
| 6 | Orange-breasted Green-Pigeon | Treron bicinctus | Fruit & Nect | Forest & Plantation | Non-endemic | Local Migrant |
| 7 | Plain Prinia | Prinia inornata | Invertebrate | Non-specialized | Non-endemic | Resident |
| 8 | Red-vented Bulbul | Pycnonotus cafer | Omnivore | Non-specialized | Non-endemic | Resident |
| 9 | Yellow-eyed Babbler | Chrysomma sinense | Invertebrate | Non-specialized | Non-endemic | Resident |
| 10 | Yellow-footed Green-Pigeon | Treron phoenicopterus | Fruit & Nect | Non-specialized | Non-endemic | Resident |
| 11 | Indian Pied Starling | Gracupica contra | Omnivore | Non-specialized | Non-endemic | Resident |
| 12 | Asian Palm Swift | Cypsiurus balasiensis | Invertebrate | Non-specialized | Non-endemic | Resident |
| 13 | Black Drongo | Dicrurus macrocercus | Omnivore | Open Habitat | Non-endemic | Resident & Local Migrant |
| 14 | Brown Shrike | Lanius cristatus | Invertebrate | Forest & Plantation | Non-endemic | Winter Migrant |
| 15 | Eastern Cattle Egret | Bubulcus coromandus | Invertebrate | Wetland | Non-endemic | Resident |
| 16 | Common Sandpiper | Actitis hypoleucos | Omnivore | Wetland | Non-endemic | Winter Migrant |
| 17 | Eurasian Collared-Dove | Streptopelia decaocto | Plant & Seed | Non-specialized | Non-endemic | Resident |
| 18 | Eurasian Wryneck | Jynx torquilla | Invertebrate | Open Habitat | Non-endemic | Winter Migrant & Localized Summer Migrant |
| 19 | Greater Coucal | Centropus sinensis | Omnivore | Non-specialized | Non-endemic | Resident |
| 20 | Indian Robin | Copsychus fulicatus | Invertebrate | Non-specialized | Indian Subcontinent | Resident |
| 21 | Indian Pond-Heron | Ardeola grayii | Omnivore | Non-specialized | Non-endemic | Resident |
| 22 | Laughing Dove | Spilopelia senegalensis | Plant & Seed | Non-specialized | Non-endemic | Resident |
| 23 | Little Cormorant | Microcarbo niger | Vertebrate & Carrion | Wetland | Non-endemic | Resident |
| 24 | Little Egret | Egretta garzetta | Invertebrate | Wetland | Non-endemic | Resident |
| 25 | Scaly-breasted Munia | Lonchura punctulata | Plant & Seed | Non-specialized | Non-endemic | Resident |
| 26 | Red-whiskered Bulbul | Pycnonotus jocosus | Omnivore | Non-specialized | Non-endemic | Resident |
| 27 | Rock Pigeon | Columba livia | Plant & Seed | Non-specialized | Non-endemic | Resident |
| 28 | White Wagtail | Motacilla alba | Invertebrate | Wetland | Non-endemic | Within-India Migrant & Winter Migrant |
| 29 | White-throated Kingfisher | Halcyon smyrnensis | Vertebrate & Carrion | Non-specialized | Non-endemic | Resident |
| 30 | Wood Sandpiper | Tringa glareola | Invertebrate | Wetland | Non-endemic | Winter Migrant |
| 31 | Asian Koel | Eudynamys scolopaceus | Fruit & Nect | Non-specialized | Non-endemic | Resident |
| 32 | Eurasian Hoopoe | Upupa epops | Invertebrate | Non-specialized | Non-endemic | Within-India Migrant & Winter Migrant |
| 33 | House Crow | Corvus splendens | Vertebrate & Carrion | Non-specialized | Non-endemic | Resident |
| 34 | Asian Openbill | Anastomus oscitans | Invertebrate | Wetland | Non-endemic | Resident |
| 35 | Barn Swallow | Hirundo rustica | Invertebrate | Non-specialized | Non-endemic | Within-India Migrant & Winter Migrant |
| 36 | Common Tailorbird | Orthotomus sutorius | Invertebrate | Non-specialized | Non-endemic | Resident |
| 37 | Gray Wagtail | Motacilla cinerea | Invertebrate | Non-specialized | Non-endemic | Winter Migrant & Localized Summer Migrant |
| 38 | Indian Roller | Coracias benghalensis | Omnivore | Open Habitat | Non-endemic | Resident |
| 39 | Jungle Babbler | Argya striata | Omnivore | Non-specialized | Indian Subcontinent | Resident |
| 40 | Long-tailed Shrike | Lanius schach | Invertebrate | Open Habitat | Non-endemic | Resident & Within-India Migrant |
| 41 | Oriental Magpie-Robin | Copsychus saularis | Invertebrate | Non-specialized | Non-endemic | Resident |
| 42 | Rufous Treepie | Dendrocitta vagabunda | Omnivore | Non-specialized | Non-endemic | Resident |
| 43 | White-browed Wagtail | Motacilla maderaspatensis | Invertebrate | Non-specialized | Indian Subcontinent | Resident |
| 44 | Black Kite | Milvus migrans | Vertebrate & Carrion | Non-specialized | Non-endemic | Resident & Winter Migrant |
| 45 | Shikra | Accipiter badius | Vertebrate & Carrion | Non-specialized | Non-endemic | Resident |
| 46 | Red-naped Ibis | Pseudibis papillosa | Omnivore | Non-specialized | Indian Subcontinent | Resident |
| 47 | Bronzed Drongo | Dicrurus aeneus | Invertebrate | Forest | Non-endemic | Resident |
| 48 | Black-hooded Oriole | Oriolus xanthornus | Fruit & Nect | Forest & Plantation | Non-endemic | Resident & Local Migrant |
| 49 | Blue-throated Barbet | Psilopogon asiaticus | Fruit & Nect | Forest & Plantation | Non-endemic | Resident |
| 50 | Large-billed Crow | Corvus macrorhynchos | Omnivore | Non-specialized | Non-endemic | Resident |
| 51 | Pale-billed Flowerpecker | Dicaeum erythrorhynchos | Fruit & Nect | Non-specialized | Indian Subcontinent | Resident |
| 52 | Black-rumped Flameback | Dinopium benghalense | Invertebrate | Non-specialized | Indian Subcontinent | Resident |
| 53 | Pied Cuckoo | Clamator jacobinus | Invertebrate | Non-specialized | Non-endemic | Resident & Summer Migrant |
| 54 | Purple-rumped Sunbird | Leptocoma zeylonica | Fruit & Nect | Non-specialized | Indian Subcontinent | Resident |
| 55 | Rose-ringed Parakeet | Psittacula krameri | Fruit & Nect | Non-specialized | Non-endemic | Resident |
| 56 | Black-naped Oriole | Oriolus chinensis | Fruit & Nect | Forest & Plantation | Non-endemic | Winter Migrant |
| 57 | Blue-throated Flycatcher | Cyornis rubeculoides | Invertebrate | Forest & Plantation | Non-endemic | Within-India Migrant |
| 58 | Cinnamon Bittern | Ixobrychus cinnamomeus | Vertebrate & Carrion | Wetland | Non-endemic | Resident & Local Migrant |
| 59 | Common Hawk-Cuckoo | Hierococcyx varius | Invertebrate | Forest & Plantation | Indian Subcontinent | Resident & Local Migrant |
| 60 | Common Iora | Aegithina tiphia | Invertebrate | Forest & Plantation | Non-endemic | Resident |
| 61 | Fulvous-breasted Woodpecker | Dendrocopos macei | Invertebrate | Forest | Non-endemic | Resident |
| 62 | Hair-crested Drongo | Dicrurus hottentottus | Omnivore | Forest & Plantation | Non-endemic | Resident & Winter Migrant |
| 63 | Lineated Barbet | Psilopogon lineatus | Fruit & Nect | Forest & Plantation | Non-endemic | Resident |
| 64 | Purple Sunbird | Cinnyris asiaticus | Fruit & Nect | Non-specialized | Non-endemic | Resident & Local Migrant |
| 65 | Puff-throated Babbler | Pellorneum ruficeps | Invertebrate | Forest & Plantation | Non-endemic | Resident |
| 66 | Black-winged Kite | Elanus caeruleus | Vertebrate & Carrion | Open Habitat | Non-endemic | Resident |
| 67 | Gray Francolin | Ortygornis pondicerianus | Plant & Seed | Open Habitat | Non-endemic | Resident |
| 68 | Olive-backed Pipit | Anthus hodgsoni | Invertebrate | Non-specialized | Non-endemic | Within-India Migrant & Winter Migrant |
| 69 | Paddyfield Pipit | Anthus rufulus | Invertebrate | Open Habitat | Non-endemic | Resident |
| 70 | Red-wattled Lapwing | Vanellus indicus | Invertebrate | Non-specialized | Non-endemic | Resident |
| 71 | Stork-billed Kingfisher | Pelargopsis capensis | Vertebrate & Carrion | Wetland | Non-endemic | Resident |
| 72 | Verditer Flycatcher | Eumyias thalassinus | Invertebrate | Forest & Plantation | Non-endemic | Within-India Migrant & Winter Migrant |
| 73 | White-breasted Waterhen | Amaurornis phoenicurus | Omnivore | Non-specialized | Non-endemic | Resident |
| 74 | Black-naped Monarch | Hypothymis azurea | Invertebrate | Forest & Plantation | Non-endemic | Resident & Within-India Migrant |
| 75 | Clamorous Reed Warbler | Acrocephalus stentoreus | Invertebrate | Wetland | Non-endemic | Resident & Winter Migrant |
| 76 | Common Kingfisher | Alcedo atthis | Vertebrate & Carrion | Wetland | Non-endemic | Resident |
| 77 | Cinereous Tit | Parus cinereus | Omnivore | Non-specialized | Non-endemic | Resident |
| 78 | Indian Golden Oriole | Oriolus kundoo | Omnivore | Non-specialized | Non-endemic | Within-India Migrant |
| 79 | Taiga Flycatcher | Ficedula albicilla | Invertebrate | Forest & Plantation | Non-endemic | Winter Migrant |
| 80 | Brown Wood-Owl | Strix leptogrammica | Vertebrate & Carrion | Forest | Non-endemic | Resident |
| 81 | Jerdon's Nightjar | Caprimulgus atripennis | Invertebrate | Forest & Plantation | Indian Subcontinent | Resident |
| 82 | Green-billed Malkoha | Phaenicophaeus tristis | Invertebrate | Forest | Non-endemic | Resident |
| 83 | Jungle Nightjar | Caprimulgus indicus | Invertebrate | Forest & Plantation | Indian Subcontinent | Resident & Local Migrant |
| 84 | Indochinese Roller | Coracias affinis | Omnivore | Open Habitat | Non-endemic | Resident & Local Migrant |
| 85 | Jungle Owlet | Glaucidium radiatum | Invertebrate | Forest & Plantation | Indian Subcontinent | Resident |
| 86 | Plum-headed Parakeet | Psittacula cyanocephala | Fruit & Nect | Forest | Indian Subcontinent | Resident |
| 87 | Sirkeer Malkoha | Taccocua leschenaultii | Invertebrate | Forest | Indian Subcontinent | Resident |
| 88 | Pin-striped Tit-Babbler | Mixornis gularis | Invertebrate | Forest | Non-endemic | Resident |
| 89 | Thick-billed Flowerpecker | Dicaeum agile | Fruit & Nect | Forest & Plantation | Non-endemic | Resident |
| 90 | White-rumped Shama | Copsychus malabaricus | Invertebrate | Forest | Non-endemic | Resident |
| 91 | Common Cuckoo | Cuculus canorus | Invertebrate | Non-specialized | Non-endemic | Summer Migrant & Passage Migrant |
| 92 | Gray-headed Lapwing | Vanellus cinereus | Invertebrate | Wetland | Non-endemic | Winter Migrant |
| 93 | Rufous Woodpecker | Micropternus brachyurus | Invertebrate | Forest & Plantation | Non-endemic | Resident |
| 94 | Indian Paradise-Flycatcher | Terpsiphone paradisi | Invertebrate | Forest & Plantation | Non-endemic | Resident & Within-India Migrant |
| 95 | Little Swift | Apus affinis | Invertebrate | Non-specialized | Non-endemic | Resident |
| 96 | Black-headed Cuckooshrike | Lalage melanoptera | Invertebrate | Forest & Plantation | Indian Subcontinent | Within-India Migrant |
| 97 | Brahminy Starling | Sturnia pagodarum | Omnivore | Non-specialized | Non-endemic | Resident |
| 98 | Coppersmith Barbet | Psilopogon haemacephalus | Fruit & Nect | Forest & Plantation | Non-endemic | Resident |
| 99 | Indian Pitta | Pitta brachyura | Invertebrate | Forest & Plantation | Indian Subcontinent | Within-India Migrant |
| 100 | Jerdon's Leafbird | Chloropsis jerdoni | Fruit & Nect | Forest & Plantation | Indian Subcontinent | Resident |
| 101 | Mottled Wood-Owl | Strix ocellata | Vertebrate & Carrion | Forest & Plantation | Mainland India | Resident |
| 102 | Spotted Owlet | Athene brama | Invertebrate | Non-specialized | Non-endemic | Resident |
| 103 | Streak-throated Woodpecker | Picus xanthopygaeus | Invertebrate | Forest & Plantation | Non-endemic | Resident |
| 104 | Ashy Drongo | Dicrurus leucophaeus | Invertebrate | Forest & Plantation | Non-endemic | Within-India Migrant |
| 105 | Common Woodshrike | Tephrodornis pondicerianus | Invertebrate | Forest & Plantation | Non-endemic | Resident |
| 106 | Oriental Honey-buzzard | Pernis ptilorhynchus | Vertebrate & Carrion | Forest & Plantation | Non-endemic | Resident & Winter Migrant |
| 107 | Small Minivet | Pericrocotus cinnamomeus | Invertebrate | Forest & Plantation | Non-endemic | Resident |
| 108 | Yellow-wattled Lapwing | Vanellus malabaricus | Invertebrate | Open Habitat | Indian Subcontinent | Resident |
| 109 | Ashy Woodswallow | Artamus fuscus | Invertebrate | Non-specialized | Non-endemic | Resident |
| 110 | Chestnut-tailed Starling | Sturnia malabarica | Omnivore | Forest & Plantation | Non-endemic | Resident & Within-India Migrant |
| 111 | Eurasian Kestrel | Falco tinnunculus | Vertebrate & Carrion | Open Habitat | Non-endemic | Resident & Winter Migrant |
| 112 | Greenish Warbler | Phylloscopus trochiloides | Invertebrate | Forest & Plantation | Non-endemic | Winter Migrant & Localized Summer Migrant |
| 113 | Large Cuckooshrike | Coracina macei | Invertebrate | Forest & Plantation | Non-endemic | Resident |
| 114 | Alexandrine Parakeet | Psittacula eupatria | Fruit & Nect | Forest & Plantation | Non-endemic | Resident |
| 115 | Baya Weaver | Ploceus philippinus | Plant & Seed | Non-specialized | Non-endemic | Resident |
| 116 | Medium Egret | Ardea intermedia | Invertebrate | Wetland | Non-endemic | Resident |
| 117 | Peregrine Falcon | Falco peregrinus | Vertebrate & Carrion | Open Habitat | Non-endemic | Resident & Winter Migrant |
| 118 | White-eyed Buzzard | Butastur teesa | Vertebrate & Carrion | Non-specialized | Non-endemic | Resident & Local Migrant |
| 119 | Booted Eagle | Hieraaetus pennatus | Vertebrate & Carrion | Non-specialized | Non-endemic | Winter Migrant |
| 120 | Black-crowned Night Heron | Nycticorax nycticorax | Vertebrate & Carrion | Wetland | Non-endemic | Resident |
| 121 | Bengal Bushlark | Mirafra assamica | Omnivore | Open Habitat | Indian Subcontinent | Resident |
| 122 | Great Egret | Ardea alba | Invertebrate | Wetland | Non-endemic | Resident |
| 123 | House Sparrow | Passer domesticus | Plant & Seed | Non-specialized | Non-endemic | Resident & Winter Migrant |
| 124 | Indian Cuckoo | Cuculus micropterus | Invertebrate | Forest & Plantation | Non-endemic | Summer Migrant & Localized Winter Migrant |
| 125 | Indian Silverbill | Euodice malabarica | Plant & Seed | Open Habitat | Non-endemic | Resident |
| 126 | Jungle Myna | Acridotheres fuscus | Omnivore | Non-specialized | Non-endemic | Resident |
| 127 | Lesser Whistling-Duck | Dendrocygna javanica | Plant & Seed | Wetland | Non-endemic | Resident |
| 128 | Zitting Cisticola | Cisticola juncidis | Invertebrate | Open Habitat | Non-endemic | Resident |
| 129 | Brown-headed Barbet | Psilopogon zeylanicus | Fruit & Nect | Non-specialized | Indian Subcontinent | Resident |
| 130 | Common Chiffchaff | Phylloscopus collybita | Invertebrate | Non-specialized | Non-endemic | Winter Migrant |
| 131 | Siberian Rubythroat | Calliope calliope | Invertebrate | Wetland | Non-endemic | Winter Migrant |
| 132 | Ashy Prinia | Prinia socialis | Invertebrate | Non-specialized | Indian Subcontinent | Resident |
| 133 | Brown-capped Pygmy Woodpecker | Yungipicus nanus | Invertebrate | Forest & Plantation | Indian Subcontinent | Resident |
| 134 | Indian Peafowl | Pavo cristatus | Plant & Seed | Non-specialized | Indian Subcontinent | Resident |
| 135 | Greater Flameback | Chrysocolaptes guttacristatus | Invertebrate | Forest | Non-endemic | Resident |
| 136 | Gray-backed Shrike | Lanius tephronotus | Invertebrate | Open Habitat | Non-endemic | Winter Migrant & Localized Summer Migrant |
| 137 | Indian Gray Hornbill | Ocyceros birostris | Fruit & Nect | Non-specialized | Indian Subcontinent | Resident |
| 138 | Malabar Pied-Hornbill | Anthracoceros coronatus | Fruit & Nect | Forest & Plantation | Indian Subcontinent | Resident |
| 139 | White-naped Woodpecker | Chrysocolaptes festivus | Invertebrate | Forest & Plantation | Indian Subcontinent | Resident |
| 140 | Crested Serpent-Eagle | Spilornis cheela | Vertebrate & Carrion | Forest | Non-endemic | Resident |
| 141 | Indian White-eye | Zosterops palpebrosus | Omnivore | Non-specialized | Non-endemic | Resident |
| 142 | Tawny-bellied Babbler | Dumetia hyperythra | Invertebrate | Non-specialized | Indian Subcontinent | Resident |
| 143 | Tricolored Munia | Lonchura malacca | Plant & Seed | Grassland & Scrub | Indian Subcontinent | Resident |
| 144 | Crested Goshawk | Accipiter trivirgatus | Vertebrate & Carrion | Forest | Non-endemic | Resident & Local Migrant |
| 145 | Black-winged Cuckooshrike | Lalage melaschistos | Invertebrate | Forest & Plantation | Non-endemic | Resident & Within-India Migrant |
| 146 | Yellow-throated Sparrow | Gymnoris xanthocollis | Omnivore | Forest & Plantation | Non-endemic | Resident |
| 147 | Green Sandpiper | Tringa ochropus | Invertebrate | Wetland | Non-endemic | Winter Migrant |
| 148 | Jerdon's Bushlark | Mirafra affinis | Omnivore | Open Habitat | Indian Subcontinent | Resident |
| 149 | White-bellied Drongo | Dicrurus caerulescens | Invertebrate | Forest & Plantation | Indian Subcontinent | Resident |
| 150 | Dusky Warbler | Phylloscopus fuscatus | Invertebrate | Wetland | Non-endemic | Winter Migrant |
| 151 | Eastern Yellow Wagtail | Motacilla tschutschensis | Invertebrate | Wetland | Non-endemic | Winter Migrant |
| 152 | Plaintive Cuckoo | Cacomantis merulinus | Invertebrate | Forest & Plantation | Non-endemic | Resident & Local Migrant |
| 153 | Indian Scops-Owl | Otus bakkamoena | Invertebrate | Forest & Plantation | Indian Subcontinent | Resident |
| 154 | Bank Myna | Acridotheres ginginianus | Omnivore | Non-specialized | Indian Subcontinent | Resident |
| 155 | Golden-fronted Leafbird | Chloropsis aurifrons | Fruit & Nect | Forest & Plantation | Non-endemic | Resident |
| 156 | Pied Harrier | Circus melanoleucos | Vertebrate & Carrion | Open Habitat | Non-endemic | Winter Migrant |
| 157 | Yellow-crowned Woodpecker | Leiopicus mahrattensis | Invertebrate | Forest & Plantation | Non-endemic | Resident |
| 158 | Blyth's Reed Warbler | Acrocephalus dumetorum | Invertebrate | Non-specialized | Non-endemic | Winter Migrant |
| 159 | Brown-cheeked Fulvetta | Alcippe poioicephala | Invertebrate | Forest | Non-endemic | Resident |
| 160 | Asian Emerald Dove | Chalcophaps indica | Omnivore | Forest | Non-endemic | Resident |
| 161 | Indian Nightjar | Caprimulgus asiaticus | Invertebrate | Non-specialized | Non-endemic | Resident |
| 162 | Oriental Pied-Hornbill | Anthracoceros albirostris | Fruit & Nect | Forest & Plantation | Non-endemic | Resident |
| 163 | Short-toed Snake-Eagle | Circaetus gallicus | Vertebrate & Carrion | Open Habitat | Non-endemic | Resident |
| 164 | Tickell's Blue Flycatcher | Cyornis tickelliae | Invertebrate | Forest & Plantation | Indian Subcontinent | Resident |
| 165 | Yellow-browed Warbler | Phylloscopus inornatus | Invertebrate | Forest & Plantation | Non-endemic | Winter Migrant |
| 166 | Yellow-legged Buttonquail | Turnix tanki | Plant & Seed | Non-specialized | Non-endemic | Resident & Within-India Migrant |
| 167 | Indian Cormorant | Phalacrocorax fuscicollis | Vertebrate & Carrion | Wetland | Non-endemic | Resident |
| 168 | Red Collared-Dove | Streptopelia tranquebarica | Plant & Seed | Non-specialized | Non-endemic | Resident & Local Migrant |
| 169 | Sulphur-bellied Warbler | Phylloscopus griseolus | Invertebrate | Non-specialized | Non-endemic | Within-India Migrant |
| 170 | Brown Boobook | Ninox scutulata | Invertebrate | Forest & Plantation | Non-endemic | Resident |
| 171 | Chestnut-headed Bee-eater | Merops leschenaulti | Invertebrate | Forest | Non-endemic | Resident & Within-India Migrant |
| 172 | Dark-sided Flycatcher | Muscicapa sibirica | Invertebrate | Forest | Non-endemic | Summer Migrant |
| 173 | Crimson Sunbird | Aethopyga siparaja | Omnivore | Non-specialized | Non-endemic | Resident |
| 174 | Large-tailed Nightjar | Caprimulgus macrurus | Invertebrate | Forest | Non-endemic | Resident & Local Migrant |
| 175 | Red-rumped Swallow | Cecropis daurica | Invertebrate | Non-specialized | Non-endemic | Resident & Winter Migrant |
| 176 | Orange-headed Thrush | Geokichla citrina | Omnivore | Forest & Plantation | Non-endemic | Resident & Within-India Migrant |
| 177 | White-rumped Munia | Lonchura striata | Plant & Seed | Non-specialized | Non-endemic | Resident |
| 178 | Gray-headed Woodpecker | Picus canus | Invertebrate | Forest | Non-endemic | Resident |
| 179 | Rosy Minivet | Pericrocotus roseus | Invertebrate | Forest | Non-endemic | Resident & Local Migrant |
| 180 | Fork-tailed Drongo-Cuckoo | Surniculus dicruroides | Invertebrate | Forest & Plantation | Indian Subcontinent | Within-India Migrant |
| 181 | Barred Buttonquail | Turnix suscitator | Plant & Seed | Grassland & Scrub | Non-endemic | Resident |
| 182 | Black Bittern | Ixobrychus flavicollis | Vertebrate & Carrion | Wetland | Non-endemic | Resident & Local Migrant |
| 183 | Asian Brown Flycatcher | Muscicapa dauurica | Invertebrate | Forest & Plantation | Non-endemic | Within-India Migrant & Winter Migrant |
| 184 | Gray-bellied Cuckoo | Cacomantis passerinus | Invertebrate | Non-specialized | Indian Subcontinent | Resident & Local Migrant |
| 185 | Gray Heron | Ardea cinerea | Vertebrate & Carrion | Wetland | Non-endemic | Resident |
| 186 | Jungle Bush-Quail | Perdicula asiatica | Plant & Seed | Grassland & Scrub | Indian Subcontinent | Resident |
| 187 | Red Junglefowl | Gallus gallus | Omnivore | Forest | Non-endemic | Resident |
| 188 | Tickell's Leaf Warbler | Phylloscopus affinis | Invertebrate | Non-specialized | Non-endemic | Within-India Migrant & Winter Migrant |
| 189 | Wire-tailed Swallow | Hirundo smithii | Invertebrate | Non-specialized | Non-endemic | Resident |
| 190 | Little Grebe | Tachybaptus ruficollis | Invertebrate | Wetland | Non-endemic | Resident |
| 191 | Blyth's Pipit | Anthus godlewskii | Invertebrate | Open Habitat | Non-endemic | Winter Migrant |
| 192 | Eurasian Moorhen | Gallinula chloropus | Omnivore | Wetland | Non-endemic | Resident & Local Migrant |
| 193 | Blue-tailed Bee-eater | Merops philippinus | Invertebrate | Open Habitat | Non-endemic | Within-India Migrant & Winter Migrant |
| 194 | Black-headed Ibis | Threskiornis melanocephalus | Vertebrate & Carrion | Wetland | Non-endemic | Resident |
| 195 | Cotton Pygmy-Goose | Nettapus coromandelianus | Plant & Seed | Wetland | Non-endemic | Resident |
| 196 | Eurasian Wigeon | Mareca penelope | Plant & Seed | Wetland | Non-endemic | Winter Migrant |
| 197 | Gadwall | Mareca strepera | Plant & Seed | Wetland | Non-endemic | Winter Migrant |
| 198 | Great Gray Shrike | Lanius excubitor | Vertebrate & Carrion | Grassland | Non-endemic | Resident & Winter Migrant |
| 199 | Indian Yellow Tit | Machlolophus aplonotus | Invertebrate | Forest & Plantation | Mainland India | Resident |
| 200 | Banded Bay Cuckoo | Cacomantis sonneratii | Invertebrate | Forest & Plantation | Non-endemic | Resident & Local Migrant |
| 201 | Oriental Skylark | Alauda gulgula | Omnivore | Open Habitat | Non-endemic | Resident & Local Migrant |
| 202 | Yellow Bittern | Ixobrychus sinensis | Invertebrate | Wetland | Non-endemic | Resident & Local Migrant |
| 203 | Ashy-crowned Sparrow-Lark | Eremopterix griseus | Plant & Seed | Open Habitat | Indian Subcontinent | Resident |
| 204 | Chestnut-winged Cuckoo | Clamator coromandus | Invertebrate | Forest & Plantation | Non-endemic | Summer Migrant & Localized Winter Migrant |
| 205 | Red-breasted Parakeet | Psittacula alexandri | Fruit & Nect | Forest | Non-endemic | Resident |
| 206 | Siberian Stonechat | Saxicola maurus | Invertebrate | Open Habitat | Non-endemic | Winter Migrant & Localized Summer Migrant |
| 207 | Oriental Turtle-Dove | Streptopelia orientalis | Plant & Seed | Non-specialized | Non-endemic | Within-India Migrant |
| 208 | Scaly Thrush | Zoothera dauma | Invertebrate | Forest & Plantation | Non-endemic | Resident & Local Migrant |
| 209 | Black Eagle | Ictinaetus malaiensis | Vertebrate & Carrion | Forest | Non-endemic | Resident |
| 210 | Black Redstart | Phoenicurus ochruros | Invertebrate | Non-specialized | Non-endemic | Winter Migrant & Localized Summer Migrant |
| 211 | Common Buzzard | Buteo buteo | Vertebrate & Carrion | Non-specialized | Non-endemic | Winter Migrant |
| 212 | Indian Thick-knee | Burhinus indicus | Invertebrate | Open Habitat | Non-endemic | Resident |
| 213 | Savanna Nightjar | Caprimulgus affinis | Invertebrate | Grassland & Scrub | Non-endemic | Resident & Local Migrant |
| 214 | Large-billed Leaf Warbler | Phylloscopus magnirostris | Invertebrate | Forest | Non-endemic | Within-India Migrant & Winter Migrant |
| 215 | Citrine Wagtail | Motacilla citreola | Invertebrate | Wetland | Non-endemic | Winter Migrant & Localized Summer Migrant |
| 216 | Red-breasted Flycatcher | Ficedula parva | Invertebrate | Forest & Plantation | Non-endemic | Winter Migrant |
| 217 | Forest Wagtail | Dendronanthus indicus | Invertebrate | Forest & Plantation | Non-endemic | Winter Migrant |
| 218 | Eurasian Hobby | Falco subbuteo | Invertebrate | Open Habitat | Non-endemic | Winter Migrant & Localized Summer Migrant |
| 219 | Blue-capped Rock-Thrush | Monticola cinclorhyncha | Invertebrate | Forest | Non-endemic | Within-India Migrant |
| 220 | Bluethroat | Luscinia svecica | Invertebrate | Wetland | Non-endemic | Winter Migrant & Localized Summer Migrant |
| 221 | Booted Warbler | Iduna caligata | Invertebrate | Open Habitat | Non-endemic | Winter Migrant |
| 222 | Common Babbler | Argya caudata | Omnivore | Open Habitat | Indian Subcontinent | Resident |
| 223 | Pied Bushchat | Saxicola caprata | Invertebrate | Open Habitat | Non-endemic | Resident & Within-India Migrant |
| 224 | Black Francolin | Francolinus francolinus | Plant & Seed | Open Habitat | Non-endemic | Resident |
| 225 | Pallid Harrier | Circus macrourus | Vertebrate & Carrion | Grassland | Non-endemic | Winter Migrant |
| 226 | Red-necked Falcon | Falco chicquera | Vertebrate & Carrion | Open Habitat | Non-endemic | Resident |
| 227 | Common Rosefinch | Carpodacus erythrinus | Plant & Seed | Non-specialized | Non-endemic | Winter Migrant & Localized Summer Migrant |
| 228 | Lesser Whitethroat | Curruca curruca | Invertebrate | Non-specialized | Non-endemic | Winter Migrant & Localized Summer Migrant |
| 229 | Bronze-winged Jacana | Metopidius indicus | Plant & Seed | Wetland | Non-endemic | Resident |
| 230 | Greater Painted-Snipe | Rostratula benghalensis | Invertebrate | Wetland | Non-endemic | Resident |
| 231 | Streak-throated Swallow | Petrochelidon fluvicola | Invertebrate | Open Habitat | Non-endemic | Local Migrant |
| 232 | Pheasant-tailed Jacana | Hydrophasianus chirurgus | Invertebrate | Wetland | Non-endemic | Resident |
| 233 | Purple Heron | Ardea purpurea | Vertebrate & Carrion | Wetland | Non-endemic | Resident |
| 234 | Lesser Coucal | Centropus bengalensis | Invertebrate | Wetland | Non-endemic | Resident |
| 235 | Pacific Golden-Plover | Pluvialis fulva | Invertebrate | Wetland | Non-endemic | Winter Migrant |
| 236 | Common Snipe | Gallinago gallinago | Invertebrate | Wetland | Non-endemic | Winter Migrant |
| 237 | Striated Heron | Butorides striata | Vertebrate & Carrion | Wetland | Non-endemic | Resident |
| 238 | Hume's Warbler | Phylloscopus humei | Invertebrate | Forest & Plantation | Non-endemic | Winter Migrant & Localized Summer Migrant |
| 239 | Yellow-vented Warbler | Phylloscopus cantator | Invertebrate | Forest | Eastern Himalayas | Resident & Local Migrant |
| 240 | Common Greenshank | Tringa nebularia | Invertebrate | Wetland | Non-endemic | Winter Migrant |
| 241 | Mongolian Short-toed Lark | Calandrella dukhunensis | Invertebrate | Grassland | Non-endemic | Winter Migrant |
| 242 | Oriental Pratincole | Glareola maldivarum | Invertebrate | Wetland | Non-endemic | Summer Migrant & Localized Winter Migrant |
| 243 | Black-breasted Weaver | Ploceus benghalensis | Plant & Seed | Wetland | Indian Subcontinent | Resident |
| 244 | Scarlet Minivet | Pericrocotus speciosus | Invertebrate | Forest | Non-endemic | Resident |
| 245 | Tickell's Thrush | Turdus unicolor | Omnivore | Forest & Plantation | Indian Subcontinent | Within-India Migrant |
| 246 | White-browed Bulbul | Pycnonotus luteolus | Fruit & Nect | Forest & Plantation | Indian Subcontinent | Resident |
| 247 | Ashy-headed Green-Pigeon | Treron phayrei | Fruit & Nect | Forest | Non-endemic | Resident |
| 248 | Pied Kingfisher | Ceryle rudis | Vertebrate & Carrion | Wetland | Non-endemic | Resident |
| 249 | Long-legged Buzzard | Buteo rufinus | Vertebrate & Carrion | Non-specialized | Non-endemic | Winter Migrant |
| 250 | Green-crowned Warbler | Phylloscopus burkii | Invertebrate | Forest | Non-endemic | Summer Migrant & Localized Winter Migrant |
| 251 | Slaty-breasted Rail | Lewinia striata | Omnivore | Wetland | Non-endemic | Resident & Local Migrant |
| 252 | Kentish Plover | Anarhynchus alexandrinus | Invertebrate | Wetland | Resident & Winter Migrant | Resident & Winter Migrant |
| 253 | Little Ringed Plover | Charadrius dubius | Invertebrate | Open Habitat | Non-endemic | Resident & Winter Migrant |
| 254 | Richard's Pipit | Anthus richardi | Invertebrate | Open Habitat | Non-endemic | Winter Migrant |
| 255 | Ruddy Shelduck | Tadorna ferruginea | Plant & Seed | Wetland | Non-endemic | Winter Migrant & Localized Summer Migrant |
| 256 | Bar-headed Goose | Anser indicus | Plant & Seed | Wetland | Non-endemic | Winter Migrant & Localized Summer Migrant |
| 257 | Marsh Sandpiper | Tringa stagnatilis | Invertebrate | Wetland | Non-endemic | Winter Migrant |
| 258 | Gray-headed Swamphen | Porphyrio poliocephalus | Omnivore | Wetland | Non-endemic | Resident |
| 259 | Watercock | Gallicrex cinerea | Plant & Seed | Wetland | Non-endemic | Resident & Within-India Migrant |
| 260 | House Swift | Apus nipalensis | Invertebrate | Non-specialized | Non-endemic | Resident |
| 261 | Red Avadavat | Amandava amandava | Plant & Seed | Grassland & Scrub | Non-endemic | Resident |
| 262 | Garganey | Spatula querquedula | Plant & Seed | Wetland | Non-endemic | Winter Migrant |
| 263 | White-capped Bunting | Emberiza stewarti | Plant & Seed | Non-specialized | Non-endemic | Within-India Migrant |
| 264 | Eastern Orphean Warbler | Curruca crassirostris | Invertebrate | Grassland & Scrub | Non-endemic | Winter Migrant |
| 265 | Gray-necked Bunting | Emberiza buchanani | Plant & Seed | Grassland & Scrub | Non-endemic | Winter Migrant |
| 266 | Tree Pipit | Anthus trivialis | Invertebrate | Non-specialized | Non-endemic | Winter Migrant |
| 267 | Paddyfield Warbler | Acrocephalus agricola | Invertebrate | Wetland | Non-endemic | Winter Migrant |
| 268 | Pale-chinned Flycatcher | Cyornis poliogenys | Invertebrate | Forest | Non-endemic | Resident |
| 269 | Tibetan Sand-Plover | Anarhynchus atrifrons | Invertebrate | Wetland | Non-endemic | Winter Migrant |
| 270 | Temminck's Stint | Calidris temminckii | Invertebrate | Wetland | Non-endemic | Winter Migrant |
| 271 | River Lapwing | Vanellus duvaucelii | Invertebrate | Wetland | Non-endemic | Resident & Local Migrant |
| 272 | Brown Fish-Owl | Ketupa zeylonensis | Vertebrate & Carrion | Non-specialized | Non-endemic | Resident |
| 273 | Black-headed Bunting | Emberiza melanocephala | Plant & Seed | Open Habitat | Non-endemic | Winter Migrant |
| 274 | Eurasian Goshawk | Accipiter gentilis | Vertebrate & Carrion | Forest | Non-endemic | Resident & Local Migrant |
| 275 | Thick-billed Warbler | Arundinax aedon | Invertebrate | Non-specialized | Non-endemic | Winter Migrant |
| 276 | Brown-breasted Flycatcher | Muscicapa muttui | Invertebrate | Forest & Plantation | Non-endemic | Winter Migrant |
| 277 | Rusty-tailed Flycatcher | Ficedula ruficauda | Invertebrate | Forest | Non-endemic | Within-India Migrant |
| 278 | Eurasian Sparrowhawk | Accipiter nisus | Vertebrate & Carrion | Non-specialized | Non-endemic | Resident & Winter Migrant |
| 279 | Gray Bushchat | Saxicola ferreus | Invertebrate | Non-specialized | Non-endemic | Resident & Within-India Migrant |
| 280 | Pale-capped Pigeon | Columba punicea | Plant & Seed | Forest & Plantation | Non-endemic | Resident |
| 281 | Amur Falcon | Falco amurensis | Invertebrate | Open Habitat | Non-endemic | Passage Migrant |
| 282 | Brown-rumped Minivet | Pericrocotus cantonensis | Invertebrate | Forest | Non-endemic | Winter Migrant |
| 283 | Asian Woolly-necked Stork | Ciconia episcopus | Vertebrate & Carrion | Open Habitat | Non-endemic | Resident |
| 284 | Great Cormorant | Phalacrocorax carbo | Vertebrate & Carrion | Wetland | Non-endemic | Resident & Winter Migrant |
| 285 | Lesser Adjutant | Leptoptilos javanicus | Vertebrate & Carrion | Wetland | Non-endemic | Resident & Local Migrant |
| 286 | Black-winged Stilt | Himantopus himantopus | Invertebrate | Wetland | Non-endemic | Resident & Local Migrant |
| 287 | Baillon's Crake | Zapornia pusilla | Omnivore | Wetland | Non-endemic | Winter Migrant |
| 288 | Rosy Starling | Pastor roseus | Invertebrate | Non-specialized | Non-endemic | Winter Migrant |
| 289 | Indian Blackbird | Turdus simillimus | Omnivore | Non-specialized | Indian Subcontinent | Resident & Within-India Migrant |
| 290 | Indian Blue Robin | Larvivora brunnea | Invertebrate | Forest & Plantation | Non-endemic | Within-India Migrant & Winter Migrant |
| 291 | Gray-throated Martin | Riparia chinensis | Invertebrate | Wetland | Non-endemic | Resident |
| 292 | Little Stint | Calidris minuta | Invertebrate | Wetland | Non-endemic | Winter Migrant |
| 293 | Ruddy-breasted Crake | Zapornia fusca | Omnivore | Wetland | Non-endemic | Resident |
| 294 | Small Pratincole | Glareola lactea | Invertebrate | Wetland | Non-endemic | Resident |
| 295 | Ruff | Calidris pugnax | Invertebrate | Wetland | Non-endemic | Winter Migrant |
| 296 | Black Stork | Ciconia nigra | Vertebrate & Carrion | Wetland | Non-endemic | Winter Migrant |
| 297 | Pallas's Gull | Ichthyaetus ichthyaetus | Vertebrate & Carrion | Wetland | Non-endemic | Winter Migrant |
| 298 | River Tern | Sterna aurantia | Omnivore | Wetland | Non-endemic | Resident & Local Migrant |
| 299 | Whiskered Tern | Chlidonias hybrida | Vertebrate & Carrion | Wetland | Non-endemic | Winter Migrant & Localized Summer Migrant |
| 300 | Northern Pintail | Anas acuta | Plant & Seed | Wetland | Non-endemic | Winter Migrant |
| 301 | Northern Shoveler | Spatula clypeata | Plant & Seed | Wetland | Non-endemic | Winter Migrant |
| 302 | Bank Swallow | Riparia riparia | Invertebrate | Wetland | Non-endemic | Winter Migrant |
| 303 | Bristled Grassbird | Schoenicola striatus | Invertebrate | Wetland | Indian Subcontinent | Within-India Migrant |
| 304 | Oriental Darter | Anhinga melanogaster | Vertebrate & Carrion | Wetland | Non-endemic | Resident |
| 305 | Painted Stork | Mycteria leucocephala | Vertebrate & Carrion | Wetland | Non-endemic | Resident |
| 306 | Little Tern | Sternula albifrons | Vertebrate & Carrion | Wetland | Non-endemic | Winter Migrant & Localized Summer Migrant |
| 307 | Chestnut Munia | Lonchura atricapilla | Plant & Seed | Grassland & Scrub | Non-endemic | Resident |
| 308 | Eurasian Curlew | Numenius arquata | Omnivore | Wetland | Non-endemic | Winter Migrant |
| 309 | Tufted Duck | Aythya fuligula | Omnivore | Wetland | Non-endemic | Winter Migrant |
| 310 | Red-crested Pochard | Netta rufina | Plant & Seed | Wetland | Non-endemic | Winter Migrant |
| 311 | Eurasian Coot | Fulica atra | Plant & Seed | Wetland | Non-endemic | Resident & Winter Migrant |
| 312 | Ferruginous Duck | Aythya nyroca | Plant & Seed | Wetland | Non-endemic | Winter Migrant |
| 313 | Osprey | Pandion haliaetus | Vertebrate & Carrion | Wetland | Non-endemic | Winter Migrant |
| 314 | Glossy Ibis | Plegadis falcinellus | Invertebrate | Wetland | Non-endemic | Resident |
| 315 | Pin-tailed Snipe | Gallinago stenura | Invertebrate | Wetland | Non-endemic | Winter Migrant |
| 316 | Tricolored x Chestnut Munia (hybrid) | Lonchura malacca x atricapilla | Plant & Seed | Grassland & Scrub | Non-endemic | Resident |
| 317 | Crow-billed Drongo | Dicrurus annectens | Invertebrate | Forest | Non-endemic | Summer Migrant |
| 318 | Sykes's Warbler | Iduna rama | Invertebrate | Forest & Plantation | Non-endemic | Winter Migrant |
| 319 | Sand Lark | Alaudala raytal | Invertebrate | Open Habitat | Non-endemic | Resident |
| 320 | Brahminy Kite | Haliastur indus | Vertebrate & Carrion | Wetland | Non-endemic | Resident |
| 321 | White-throated Fantail | Rhipidura albicollis | Invertebrate | Forest & Plantation | Non-endemic | Resident & Altitudinal Migrant |
| 322 | Western Marsh Harrier | Circus aeruginosus | Vertebrate & Carrion | Open Habitat | Non-endemic | Winter Migrant |
| 323 | Black-headed Gull | Chroicocephalus ridibundus | Omnivore | Wetland | Non-endemic | Winter Migrant |
| 324 | Lesser Cuckoo | Cuculus poliocephalus | Invertebrate | Forest | Non-endemic | Summer Migrant & Localized Winter Migrant |
| 325 | Large Hawk-Cuckoo | Hierococcyx sparverioides | Invertebrate | Forest | Non-endemic | Resident & Within-India Migrant |
| 326 | Striated Grassbird | Megalurus palustris | Invertebrate | Wetland | Non-endemic | Resident |
| 327 | Spotted Redshank | Tringa erythropus | Invertebrate | Wetland | Non-endemic | Winter Migrant |
| 328 | Common Grasshopper Warbler | Locustella naevia | Invertebrate | Grassland & Scrub | Non-endemic | Winter Migrant |
| 329 | Green-winged Teal | Anas crecca | Plant & Seed | Wetland | Non-endemic | Winter Migrant |
| 330 | Greater Spotted Eagle | Clanga clanga | Vertebrate & Carrion | Open Habitat | Non-endemic | Winter Migrant |
| 331 | Indian Spotted Eagle | Clanga hastata | Vertebrate & Carrion | Open Habitat | Non-endemic | Resident & Within-India Migrant |
| 332 | Black-tailed Godwit | Limosa limosa | Invertebrate | Wetland | Non-endemic | Winter Migrant |
| 333 | Hen Harrier | Circus cyaneus | Vertebrate & Carrion | Open Habitat | Non-endemic | Winter Migrant |
| 334 | Short-eared Owl | Asio flammeus | Vertebrate & Carrion | Grassland | Non-endemic | Winter Migrant |
| 335 | Chestnut-eared Bunting | Emberiza fucata | Plant & Seed | Grassland & Scrub | Non-endemic | Resident & Winter Migrant |
| 336 | Crested Bunting | Emberiza lathami | Plant & Seed | Non-specialized | Non-endemic | Resident & Local Migrant |
| 337 | Blue-breasted Quail | Synoicus chinensis | Plant & Seed | Wetland | Non-endemic | Uncertain |
| 338 | Common Quail | Coturnix coturnix | Plant & Seed | Open Habitat | Non-endemic | Winter Migrant & Localized Summer Migrant |
| 339 | Common Redshank | Tringa totanus | Invertebrate | Wetland | Non-endemic | Winter Migrant |
| 340 | Eastern Marsh Harrier | Circus spilonotus | Vertebrate & Carrion | Open Habitat | Non-endemic | Winter Migrant |
| 341 | Pallas's Grasshopper Warbler | Helopsaltes certhiola | Invertebrate | Wetland | Non-endemic | Winter Migrant |
| 342 | Ultramarine Flycatcher | Ficedula superciliaris | Invertebrate | Forest & Plantation | Non-endemic | Within-India Migrant |
| 343 | Common Pochard | Aythya ferina | Plant & Seed | Wetland | Non-endemic | Winter Migrant |
| 344 | Slaty-legged Crake | Rallina eurizonoides | Plant & Seed | Forest & Plantation | Non-endemic | Resident & Within-India Migrant |
